# Supplementary material for: Plasma Fetuin-A Levels and the Risk of Type 2 Diabetes
Source: Oxford University Press journal article supplement (doi:10.2337/db08-0538), 2008-07-16

Supplementary Table 1

| **Characteristics** | **Full cohort** | **Random subcohort before exclusions** |  | **Random subcohort after exclusions** |
| --- | --- | --- | --- | --- |
| N | 27,548 | 2,500 |  | 2,164 |
| Sex (% male) | 39.6 | 39.0 |  | 37.9 |
| Age, mean | 50.0 | 49.8 |  | 49.5 |
| BMI, mean | 26.3 | 26.1 |  | 25.9 |
| Education (%) |  |  |  |  |
| In training, vocational training | 38.7 | 37.6 |  | 37.3 |
| Technical school | 24.8 | 24.4 |  | 24.4 |
| Technical college, university | 36.5 | 38.0 |  | 38.4 |
| Smoking status (%) |  |  |  |  |
| Never smoker | 47.0 | 46.9 |  | 47.8 |
| Ex-smoker | 32.4 | 32.0 |  | 31.9 |
| Smoker | 20.6 | 21.1 |  | 20.3 |

**P*-values were all >0.05 for comparison between full cohort and random subcohort before exclusions (t-test for age and BMI; chi-square test for sex)

**SUPPLEMENTARY FIGURE 1. Frequency distribution of plasma fetuin-A measurements among men and women in the European Prospective Investigation into Cancer and Nutrition-Potsdam Study**


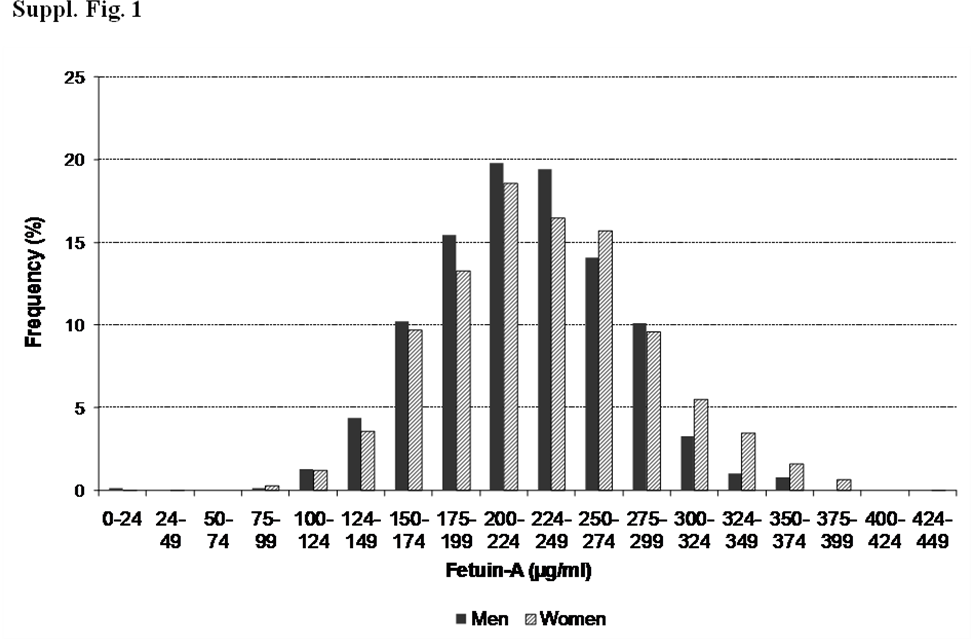

Supplement: db08-05381_suppl.doc [file db08-05381_suppl.doc]
